# Supplementary material for: Serum Amyloid A as a biomarker in Inflammatory Bowel Diseases
Source: Preprints.org preprint supplement (doi:10.20944/preprints202312.1225.v1), 2023-12-18
Supplement: Supplementary file 1 [file supplementary]

*Table 1: Correlation analyses with SAA*

| **Groups (n)** | **Spearman’s coefficient of correlation*** | | | | **P-Value** | | | |
| --- | --- | --- | --- | --- | --- | --- | --- | --- |
| **All cases (306)** |  | | | |  | | | |
| FC | 0.365 | | | | < 0.001 | | | |
| CRP | 0.623 | | | | < 0.001 | | | |
| NLR | 0.381 | | | | < 0.001 | | | |
| **CD (182), UC (116), IBDU (8)** | **CD** | **UC** | | **IBDU** | **CD** | **UC** | | **IBDU** |
| HBI | **0.082** | - | | - | **0.276** | - | | - |
| SCCAI |  | 0.300 | | - | - | 0.001 | | - |
| FC | 0.376 | 0.300 | | **0.700** | < 0.001 | 0.001 | | **0.053** |
| CRP | 0.626 | 0.607 | | **0.669** | < 0.001 | < 0.001 | | **0.070** |
| NLR | 0.405 | 0.294 | | **0.599** | < 0.001 | 0.002 | | **0.117** |
| **Disease duration (93, 113, 100)** | **0 – 5 years** | **6 – 15 years** | | **≥ 16 years** | **0 – 5 years** | **6 – 15 years** | | **≥ 16 years** |
| FC | 0.480 | 0.333 | | 0.245 | < 0.001 | < 0.001 | | 0.014 |
| CRP | 0.640 | 0.662 | | 0.550 | < 0.001 | < 0.001 | | < 0.001 |
| NLR | 0.403 | 0.454 | | 0.243 | < 0.001 | < 0.001 | | 0.015 |
| **Extraintestinal manifestation (102, 204)** | **Yes** | | **No** | | **Yes** | | **No** | |
| FC | 0.275 | | 0.415 | | 0.005 | | < 0.001 | |
| CRP | 0.612 | | 0.630 | | < 0.001 | | < 0.001 | |
| NLR | 0.484 | | 0.337 | | < 0.001 | | < 0.001 | |
| **History of resecting surgery**  **(85, 221)** | **Yes** | | **No** | | **Yes** | | **No** | |
| FC | 0.289 | | 0.393 | | 0.007 | | < 0.001 | |
| CRP | 0.529 | | 0.659 | | < 0.001 | | < 0.001 | |
| NLR | 0.308 | | 0.399 | | 0.004 | | < 0.001 | |
| **Biologic therapy (152, 154)** | **Yes** | | **No** | | **Yes** | | **No** | |
| FC | 0.461 | | 0.255 | | < 0.001 | | 0.001 | |
| CRP | 0.625 | | 0.618 | | < 0.001 | | < 0.001 | |
| NLR | 0.417 | | 0.277 | | < 0.001 | | < 0.001 | |

*The values in bold are not significant; CD Crohn’s disease, UC Ulcerative colitis, IBDU Inflammatory bowel disease unclassified

Table 2: Correlation analyses with SAA for the Montreal classification

| **Groups (n)** | **Spearman’s coefficient of correlation*** | **P-Value** |
| --- | --- | --- |
| **CD: L1 = terminal ileal (68)** |  |  |
| FC | 0.287 | 0.018 |
| CRP | 0.549 | < 0.001 |
| NLR | 0.335 | 0.005 |
| **CD: L2 = colonic (21)** |  |  |
| FC | 0.572 | 0.007 |
| CRP | 0.630 | 0.002 |
| NLR | **0.393** | 0.078 |
| **CD: L3 = ileocolonic (84)** |  |  |
| FC | 0.417 | < 0.001 |
| CRP | 0.699 | < 0.001 |
| NLR | 0.431 | < 0.001 |
| **CD: L4 = isolated upper disease (11)** |  |  |
| FC | 0.689 | 0.019 |
| CRP | **0.511** | 0.109 |
| NLR | **0.540** | 0.087 |
| **CD: B1 = non-stricturing, non-penetrating (70)** |  |  |
| FC | 0.484 | < 0.001 |
| CRP | 0.574 | < 0.001 |
| NLR | 0.486 | < 0.001 |
| **CD: B2 = stricturing (64)** |  |  |
| FC | 0.255 | 0.042 |
| CRP | 0.675 | < 0.001 |
| NLR | **0.231** | 0.067 |
| **CD: B3 = penetrating (63)** |  |  |
| FC | 0.313 | 0.013 |
| CRP | 0.700 | < 0.001 |
| NLR | 0.362 | 0.004 |
| **UC: E1 = ulcerative proctitis (12)** |  |  |
| FC | **0.090** | 0.780 |
| CRP | 0.828 | < 0.001 |
| NLR | **0.414** | 0.181 |
| **UC: E2 = left-sided UC (44)** |  |  |
| FC | **0.251** | 0.100 |
| CRP | 0.628 | < 0.001 |
| NLR | 0.319 | 0.035 |
| **UC: E3 = extensive UC (64)** |  |  |
| FC | 0.424 | < 0.001 |
| CRP | 0.590 | < 0.001 |
| NLR | **0.200** | 0.123 |

*The values in bold are not significant; L Location, B Behavior, E Extent, CD Crohn’s disease, UC Ulcerative colitis
